# Supplementary material for: Cross-Sectional Associations of Total Daily Volume and Activity Patterns across the Activity Spectrum with Cardiometabolic Risk Factors in Children and Adolescents
Source: PubMed Central journal article supplement (PMC7344989; doi:10.3390/ijerph17124286), 2020-06-16
Supplement: ijerph-17-04286-s001.pdf [file ijerph-17-04286-s001.pdf]

## Supplementary materials

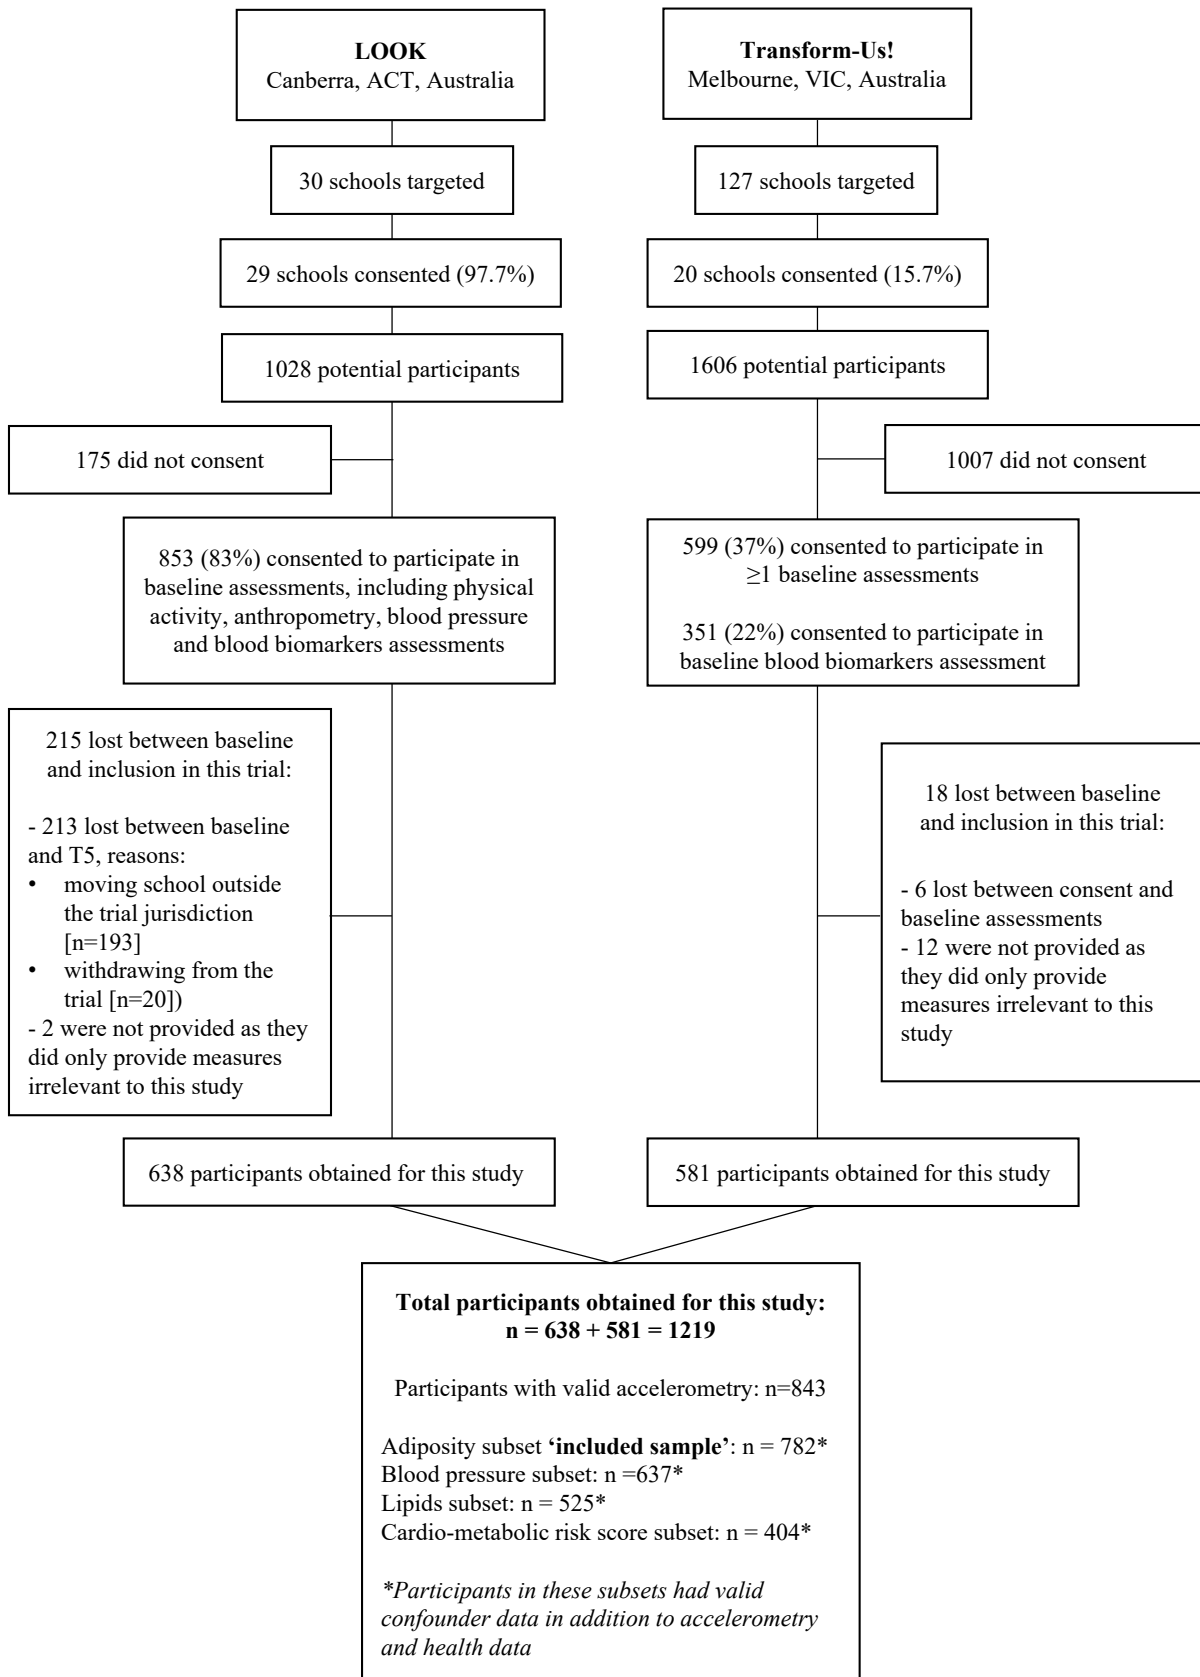

**Figure S1 Participant flow diagram**

**Table S1. Participant characteristics per trial (LOOK, Transform-Us!)**

|                               | <b>LOOK (n=638)<sup>A</sup></b>  | <b>Transform-Us! (n=581)<sup>A</sup></b> |
|-------------------------------|----------------------------------|------------------------------------------|
| <b>Trial commenced</b>        | 2005                             | 2009                                     |
| <b>Location</b>               | Canberra, Australia              | Melbourne, Australia                     |
| <b>Recruitment</b>            | School-based (29/30 agreed; 97%) | School-based (20/127 agreed; 16%)        |
| <b>Sampling design</b>        | Schools were randomly allocated  | Schools were randomly allocated          |
| <b>Sample included</b>        | Time-point 5 (2009)              | Baseline data                            |
| <b>Data collection period</b> | Sep-Dec 2008                     | Feb-June 2010                            |
| <b>Season</b>                 | Spring/Summer                    | Summer/Autumn                            |
| <b>BMI (kg/m<sup>2</sup>)</b> | 19.6 ± 3.3                       | 17.6 ± 2.9                               |
| <b>zBMI</b>                   | 0.5 ± 1.1                        | 0.6 ± 1.2                                |
| <b>WC (cm)</b>                | 67.6 ± 8.9                       | 59.9 ± 7.1                               |
| <b>SBP (mmHg)</b>             | 112.4 ± 8.4                      | 101.8 ± 8.9                              |
| <b>DBP (mmHg)</b>             | 61.5 ± 6.1                       | 60.5 ± 8.5                               |
| <b>HDL-C (mmol/L)</b>         | 1.4 ± 0.3                        | 1.6 ± 0.3                                |
| <b>LDL-C (mmol/L)</b>         | 2.5 ± 0.7                        | 2.6 ± 0.7                                |

|                                    |              |             |
|------------------------------------|--------------|-------------|
| <b>TG (mmol/L)</b>                 | 0.9 ± 0.5    | 0.7 ± 0.3   |
| <b>CMR-score</b>                   | 1.6 ± 3.3    | -1.8 ± 3.0  |
| <b>Age (years)</b>                 | 12.02 ± 0.35 | 8.69 ± 0.39 |
| <b>Age-range (years [min-max])</b> | 10.96-13.06  | 7.04-10.38  |

Data are presented as Mean ± SD unless otherwise indicated.

<sup>A</sup> These n's represent participants who had raw data for one or more assessed variables relevant to this study (total n=1219). The n's per variable in this table may vary, as not all participants had data on all of the variables (see Figure S1).

BP Blood pressure; SES Socio-Economic Status; BMI Body mass index; zBMI Body mass index converted to the World Health Organization (WHO) Child Growth Standards age and sex standardized z-values [20]; WC Waist circumference; SBP Systolic blood pressure; DBP Diastolic blood pressure; HDL-C High-density lipoprotein cholesterol; LDL-C Low-density lipoprotein cholesterol; TG Triglycerides; CMR-score Cardiometabolic risk score.

**Table S2. Participant characteristics of included sample, subsets and excluded sample**

|                                         | <b>Included sample<br/>(n=782)<br/>Mean ± SD</b>        | <b>Blood pressure<br/>subset<br/>(n=637)<br/>Mean ± SD</b> | <b>Lipids subset<br/>(n=525)<br/>Mean ± SD</b>          | <b>CMR-score subset<br/>(n=404)<br/>Mean ± SD</b>       | <b>Excluded sample<br/>(n=437)<sup>A</sup><br/>Mean ± SD</b> |
|-----------------------------------------|---------------------------------------------------------|------------------------------------------------------------|---------------------------------------------------------|---------------------------------------------------------|--------------------------------------------------------------|
| <i>General characteristics</i>          |                                                         |                                                            |                                                         |                                                         |                                                              |
| <b>Trial involvement</b>                | LOOK<br>413 (52.8%)<br>Transform-<br>369 (47.2%)<br>Us! | LOOK<br>279 (43.8%)<br>Transform-<br>358 (56.2%)<br>Us!    | LOOK<br>350 (66.7%)<br>Transform-<br>175 (33.3%)<br>Us! | LOOK<br>229 (56.7%)<br>Transform-<br>175 (43.3%)<br>Us! | LOOK<br>225 (51.5%)<br>Transform-<br>212 (48.5%)<br>Us!      |
| <b>Age (years)</b>                      | 10.5 ± 1.7                                              | 10.2 ± 1.7                                                 | 10.9 ± 1.6                                              | 10.6 ± 1.7                                              | 10.2 ± 1.7                                                   |
| <b>SES (% high/mid/low)</b>             | 3/36/61                                                 | 3/33/63                                                    | 1/33/65                                                 | 1/30/69                                                 | 7/43/49                                                      |
| <b>Sex (% female)</b>                   | 55.1%                                                   | 55.0%                                                      | 55.1%                                                   | 54.5%                                                   | 50.6%                                                        |
| <i>Cardiometabolic health variables</i> |                                                         |                                                            |                                                         |                                                         |                                                              |
| <b>BMI (kg/m<sup>2</sup>)</b>           | 18.7 ± 3.3                                              | 18.5 ± 3.3                                                 | 18.9 ± 3.3                                              | 18.7 ± 3.3                                              | 18.4 ± 3.2                                                   |
| <b>zBMI</b>                             | 0.5 ± 1.1                                               | 0.5 ± 1.2                                                  | 0.5 ± 1.1                                               | 0.5 ± 1.1                                               | 0.5 ± 1.2                                                    |

|                       |            |            |            |            |            |
|-----------------------|------------|------------|------------|------------|------------|
| <b>WC (cm)</b>        | 64.1 ± 9.0 | 63.4 ± 9.1 | 65.0 ± 9.1 | 64.3 ± 9.3 | 63.1 ± 8.7 |
| <b>SBP (mmHg)</b>     | NA         | 106 ± 10   | 108 ± 10   | 108 ± 10   | 106 ± 10   |
| <b>DBP (mmHg)</b>     | NA         | 61 ± 8     | 61 ± 7     | 61 ± 7     | 61 ± 8     |
| <b>HDL-C (mmol/L)</b> | NA         | NA         | 1.5 ± 0.3  | 1.5 ± 0.3  | 1.5 ± 0.3  |
| <b>LDL-C (mmol/L)</b> | NA         | NA         | 2.5 ± 0.7  | 2.6 ± 0.7  | 2.5 ± 0.7  |
| <b>TG (mmol/L)</b>    | NA         | NA         | 0.8 ± 0.4  | 0.8 ± 0.4  | 0.9 ± 0.6  |
| <b>CMR-score</b>      | NA         | NA         | NA         | 0.1 ± 3.6  | 0.3 ± 3.6  |

Data are presented as Mean ± SD unless otherwise indicated.

<sup>A</sup> Total number of excluded sample was 437 participants (i.e., participants without valid adiposity and/or accelerometry data), however, n's per variable in this table may vary, as not all participants had data on all of the variables.

BP Blood pressure; SES Socio-Economic Status; BMI Body mass index; zBMI Body mass index converted to the World Health Organization (WHO) Child Growth Standards age and sex standardized z-values [20]; WC Waist circumference; SBP Systolic blood pressure; DBP Diastolic blood pressure; HDL-C High-density lipoprotein cholesterol; LDL-C Low-density lipoprotein cholesterol; TG Triglycerides; CMR-score Cardiometabolic risk score.

**Table S3. Descriptives for accelerometer-derived variables and activity patterns across the activity spectrum, of included sample (n=782)**

| <b>Variables</b>                                             | <b>Mean ± SD</b><br><b>(% of participants engaging in behavior, if applicable)</b> |          |
|--------------------------------------------------------------|------------------------------------------------------------------------------------|----------|
| <i>Accelerometer-derived variables</i>                       |                                                                                    |          |
| Valid weekdays (no.)                                         | 4.7 ± 1.1                                                                          |          |
| Valid weekend days (no.)                                     | 1.7 ± 0.7                                                                          |          |
| Total valid days (no.)                                       | 6.3 ± 1.5                                                                          |          |
| Total wear-time (min/day)                                    | 734.1 ± 77.9                                                                       |          |
| Total daily volume SED (min/day)                             | 437.6 ± 78.1                                                                       |          |
| Total daily volume LPA (min/day)                             | 229.9 ± 35.4                                                                       |          |
| Total daily volume MPA (min/day)                             | 46.0 ± 15.3                                                                        |          |
| Total daily volume VPA (min/day)                             | 20.7 ± 12.6                                                                        |          |
| <i>Accelerometer-derived pattern variables</i>               |                                                                                    |          |
| Breaks in SED time (no. per day)                             | 310.8 ± 42.0                                                                       | (100.0%) |
| Time accumulated in ≥5-min SED bouts (min/day)               | 169.6 ± 65.8                                                                       | (100.0%) |
| Time accumulated in ≥10-min SED bouts (min/day)              | 81.0 ± 45.9                                                                        | (100.0%) |
| Time accumulated in ≥1-min LPA bouts (min/day)               | 103.9 ± 24.9                                                                       | (100.0%) |
| Time accumulated in ≥5-min LPA bouts (min/day)               | 2.5 ± 3.0                                                                          | (74.3%)  |
| Time accumulated in ≥10-min LPA bouts (min/day) <sup>A</sup> | 0.2 ± 0.9                                                                          | (8.6%)   |
| Time accumulated in ≥1-min MPA bouts (min/day)               | 8.6 ± 4.6                                                                          | (100.0%) |
| Time accumulated in ≥5-min MPA bouts (min/day) <sup>A</sup>  | 0.3 ± 1.1                                                                          | (17.3%)  |
| Time accumulated in ≥10-min MPA bouts (min/day) <sup>A</sup> | 0.0 ± 0.4                                                                          | (2.2%)   |
| Time accumulated in ≥1-min VPA bouts (min/day)               | 5.8 ± 6.0                                                                          | (98.7%)  |
| Time accumulated in ≥5-min VPA bouts (min/day) <sup>A</sup>  | 0.6 ± 1.9                                                                          | (23.9%)  |
| Time accumulated in ≥10-min VPA bouts (min/day) <sup>A</sup> | 0.2 ± 1.1                                                                          | (4.4%)   |

Breaks in SED (number per day) were defined as an interruption in SED where counts exceeded 25 counts per 15-s epoch and averaged over all valid days.

Bouts were calculated as the average daily time accumulated in either  $\geq 1$ -min,  $\geq 5$ -min or  $\geq 10$ -min bouts of the corresponding intensities (in minutes), and averaged over included days. The presented numbers are the Mean  $\pm$  SD across the sample.

<sup>A</sup> As only a quarter of the sample or less engaged in these activity patterns, these variables were excluded from further analyses.

SED Sedentary; LPA Light-intensity physical activity; MPA Moderate-intensity physical activity; VPA Vigorous-intensity physical activity.

**Table S4. Associations of total daily volume of sedentary behavior, and in light-, moderate- and vigorous-intensity physical activity with cardiometabolic risk factors (n=782)**

| <b>Partially-adjusted Models 2</b> |                                 |                           |                                     |                                     |
|------------------------------------|---------------------------------|---------------------------|-------------------------------------|-------------------------------------|
|                                    | <b>SED<sup>A</sup></b>          | <b>LPA<sup>A</sup></b>    | <b>MPA<sup>A</sup></b>              | <b>VPA<sup>A</sup></b>              |
|                                    | <b>β (95% CI)</b>               | <b>β (95% CI)</b>         | <b>β (95% CI)</b>                   | <b>β (95% CI)</b>                   |
| zBMI                               | 0.0004 (-0.0017, 0.0025)        | 0.0020 (-0.0006, 0.0047)  | -0.0028 (-0.0109, 0.0053)           | <b>-0.0244** (-0.0324, -0.0163)</b> |
| WC                                 | 0.0089 (-0.0043, 0.0220)        | 0.0080 (-0.0100, 0.0261)  | -0.0434 (-0.0914, 0.0046)           | <b>-0.1842** (-0.2370, -0.1314)</b> |
| SBP <sup>B</sup>                   | 0.0047 (-0.0139, 0.0233)        | -0.0030 (-0.0287, 0.0228) | 0.0012 (-0.0557, 0.0581)            | -0.0243 (-0.1069, 0.0584)           |
| DBP <sup>B</sup>                   | 0.0062 (-0.0078, 0.0201)        | -0.0022 (-0.0223, 0.0180) | -0.0137 (-0.0632, 0.0358)           | -0.0471 (-0.1303, 0.0361)           |
| HDL-C <sup>C</sup>                 | -0.0002 (-0.0009, 0.0005)       | -0.0003 (-0.0011, 0.0005) | <b>0.0022* (0.0001, 0.0043)</b>     | <b>0.0054** (0.0017, 0.0092)</b>    |
| LDL-C <sup>C</sup>                 | 0.0002 (-0.0010, 0.0013)        | 0.0010 (-0.0010, 0.0029)  | -0.0030 (-0.0069, 0.0008)           | <b>-0.0085* (-0.0160, -0.0010)</b>  |
| TG <sup>D</sup>                    | <b>0.0009* (0.0002, 0.0016)</b> | -0.0006 (-0.0016, 0.0004) | <b>-0.0040** (-0.0063, -0.0016)</b> | <b>-0.0062** (-0.0100, -0.0024)</b> |
| CMR-score <sup>D</sup>             | 0.0051 (-0.0038, 0.0140)        | 0.0038 (-0.0072, 0.0149)  | <b>-0.0363** (-0.0602, -0.0124)</b> | <b>-0.0771** (-0.1183, -0.0358)</b> |



$\beta$  (95% CI) Regression coefficients and 95% confidence intervals. Significant findings are reported in **bold**.

\* ( $p < 0.05$ ); \*\* ( $p < 0.01$ ).

Partially-adjusted Model 2 adjusted for participants' wear-time and trial involvement, age, sex, and accounted for clustering within schools.

Minimally-adjusted Model 1 and fully-adjusted Model 3 can be found in Table 1 within the manuscript.

A Variables were averaged of total included valid day.

B Included subset of 637 youth.

C Included subset of 525 youth.

D Included subset of 404 youth.

SED Sedentary; LPA Light-intensity physical activity; MPA Moderate-intensity physical activity; MVPA Moderate-to-vigorous-intensity physical activity; VPA Vigorous-intensity physical activity; zBMI Body mass index converted to the World Health Organization (WHO) Child Growth Standards age and sex standardized z-values [20]; WC Waist circumference; SBP Systolic blood pressure; DBP Diastolic blood pressure; HDL-C High-density lipoprotein cholesterol; LDL-C Low-density lipoprotein cholesterol; TG Triglycerides; CMR-score Cardiometabolic risk score.

**Table S5. Associations of activity patterns with adiposity indicators (n=782) and blood pressure markers (n=637)**

|                           |         | <b>zBMI</b>               | <b>Waist circumference</b> | <b>Systolic blood pressure</b> | <b>Diastolic blood pressure</b> |
|---------------------------|---------|---------------------------|----------------------------|--------------------------------|---------------------------------|
|                           |         | <b>β (95% CI)</b>         | <b>β (95% CI)</b>          | <b>β (95% CI)</b>              | <b>β (95% CI)</b>               |
| <b>Breaks in SED time</b> | Model 1 | -0.0016 (-0.0046, 0.0014) | -0.0127 (-0.0366, 0.0113)  | -0.0222 (-0.0486, 0.0043)      | 0.0043 (-0.0162, 0.0248)        |
| <b>(no. per day)</b>      | Model 2 | -0.0016 (-0.0046, 0.0014) | -0.0128 (-0.0367, 0.0112)  | -0.0222 (-0.0486, 0.0043)      | 0.0043 (-0.0160, 0.0246)        |
|                           | Model 3 | -0.0007 (-0.0040, 0.0025) | -0.0053 (-0.0295, 0.0190)  | -0.0173 (-0.0436, 0.0090)      | 0.0044 (-0.0193, 0.0281)        |
|                           | Model 4 | -0.0007 (-0.0039, 0.0025) | -0.0049 (-0.0292, 0.0195)  | -0.0157 (-0.0414, 0.0101)      | 0.0051 (-0.0185, 0.0288)        |
| <b>SED ≥5-min bouts</b>   | Model 1 | 0.0016 (-0.0017, 0.0049)  | 0.0077 (-0.0206, 0.0361)   | 0.0222 (-0.0088, 0.0532)       | -0.0047 (-0.0275, 0.0180)       |
| <b>(min/day)</b>          | Model 2 | 0.0016 (-0.0017, 0.0050)  | 0.0075 (-0.0208, 0.0358)   | 0.0200 (-0.0103, 0.0503)       | -0.0050 (-0.0276, 0.0176)       |
|                           | Model 3 | 0.0009 (-0.0025, 0.0043)  | 0.0024 (-0.0252, 0.0300)   | 0.0184 (-0.0106, 0.0474)       | -0.0040 (-0.0279, 0.0199)       |
|                           | Model 4 | 0.0008 (-0.0026, 0.0043)  | 0.0020 (-0.0256, 0.0296)   | 0.0220 (-0.0090, 0.0530)       | -0.0049 (-0.0281, 0.0184)       |
| <b>SED ≥10-min bouts</b>  | Model 1 | 0.0006 (-0.0029, 0.0040)  | -0.0011 (-0.0293, 0.0271)  | 0.0276 (-0.0055, 0.0607)       | -0.0077 (-0.0330, 0.0175)       |
| <b>(min/day)</b>          | Model 2 | 0.0006 (-0.0029, 0.0040)  | -0.0015 (-0.0296, 0.0265)  | 0.0273 (-0.0056, 0.0602)       | -0.0082 (-0.0332, 0.0167)       |

|                         |         |                                  |                                  |                                 |                           |
|-------------------------|---------|----------------------------------|----------------------------------|---------------------------------|---------------------------|
|                         | Model 3 | -0.0001 (-0.0036, 0.0035)        | -0.0051 (-0.0328, 0.0227)        | 0.0267 (-0.0061, 0.0595)        | -0.0071 (-0.0329, 0.0188) |
|                         | Model 4 | -0.0001 (-0.0037, 0.0034)        | -0.0059 (-0.0333, 0.0216)        | 0.0246 (-0.0064, 0.0557)        | -0.0084 (-0.0329, 0.0161) |
| <b>LPA ≥1-min bouts</b> | Model 1 | <b>0.0063** (0.0026, 0.0099)</b> | <b>0.0375** (0.0142, 0.0608)</b> | 0.0081 (-0.0264, 0.0426)        | -0.0011 (-0.0296, 0.0275) |
| <b>(min/day)</b>        | Model 2 | <b>0.0247** (0.0162, 0.0333)</b> | <b>0.2091** (0.1451, 0.2731)</b> | <b>0.1122* (0.0223, 0.2021)</b> | 0.0239 (-0.0336, 0.0815)  |
|                         | Model 3 | <b>0.0264** (0.0178, 0.0351)</b> | <b>0.2091** (0.1449, 0.2733)</b> | <b>0.1035* (0.0134, 0.1937)</b> | 0.0182 (-0.0367, 0.0732)  |
|                         | Model 4 | <b>0.0264** (0.0177, 0.0351)</b> | <b>0.2097** (0.1460, 0.2735)</b> | <b>0.1065* (0.0113, 0.2017)</b> | 0.0182 (-0.0376, 0.0741)  |
| <b>LPA ≥5-min bouts</b> | Model 1 | <b>0.0532** (0.0269, 0.0794)</b> | <b>0.4169** (0.1895, 0.6443)</b> | 0.1214 (-0.1351, 0.3780)        | 0.1613 (-0.0638, 0.3863)  |
| <b>(min/day)</b>        | Model 2 | <b>0.0514** (0.0254, 0.0773)</b> | <b>0.4599** (0.2173, 0.7025)</b> | 0.1738 (-0.1081, 0.4557)        | 0.2056 (-0.0301, 0.4413)  |
|                         | Model 3 | <b>0.0518** (0.0257, 0.0779)</b> | <b>0.4291** (0.1859, 0.6722)</b> | 0.1158 (-0.1704, 0.4019)        | 0.1952 (-0.0247, 0.4150)  |
|                         | Model 4 | <b>0.0519** (0.0257, 0.0781)</b> | <b>0.4290** (0.1851, 0.6728)</b> | 0.1213 (-0.1748, 0.4174)        | 0.1981 (-0.0235, 0.4197)  |
| <b>MPA ≥1-min bouts</b> | Model 1 | <b>0.0333** (0.0134, 0.0532)</b> | <b>0.1657* (0.0099, 0.3215)</b>  | 0.1403 (-0.0123, 0.2928)        | 0.0588 (-0.0659, 0.1834)  |
| <b>(min/day)</b>        | Model 2 | <b>0.0603** (0.0349, 0.0857)</b> | <b>0.4077** (0.1814, 0.6340)</b> | <b>0.2668* (0.0211, 0.5125)</b> | 0.1961 (-0.0412, 0.4333)  |
|                         | Model 3 | <b>0.0619** (0.0378, 0.0860)</b> | <b>0.4065** (0.1908, 0.6222)</b> | <b>0.2525* (0.0127, 0.4923)</b> | 0.1921 (-0.0415, 0.4257)  |

|                         |         |                                     |                                     |                                     |                                    |
|-------------------------|---------|-------------------------------------|-------------------------------------|-------------------------------------|------------------------------------|
|                         | Model 4 | <b>0.0621** (0.0379, 0.0863)</b>    | <b>0.4085** (0.1922, 0.6247)</b>    | <b>0.2589* (0.0208, 0.4971)</b>     | 0.1952 (-0.0388, 0.4291)           |
| <b>VPA ≥1-min bouts</b> | Model 1 | <b>-0.0259** (-0.0369, -0.0149)</b> | <b>-0.1717** (-0.2646, -0.0788)</b> | <b>-0.0930* (-0.1706, -0.0154)</b>  | <b>-0.0888* (-0.1758, -0.0018)</b> |
| <b>(min/day)</b>        | Model 2 | -0.0184 (-0.0378, 0.0009)           | -0.0622 (-0.2344, 0.1101)           | <b>-0.1955** (-0.3196, -0.0713)</b> | -0.0804 (-0.2202, 0.0594)          |
|                         | Model 3 | -0.0112 (-0.0314, 0.0089)           | -0.0181 (-0.2051, 0.1689)           | <b>-0.1784** (-0.3107, -0.0460)</b> | -0.0835 (-0.2315, 0.0645)          |
|                         | Model 4 | -0.0110 (-0.0312, 0.0093)           | -0.0135 (-0.1998, 0.1728)           | <b>-0.1691* (-0.3087, -0.0296)</b>  | -0.0793 (-0.2274, 0.0689)          |
| <b>Median SED bouts</b> | Model 1 | 0.0166 (-0.1055, 0.1387)            | 0.1085 (-0.8204, 1.0374)            | 0.6906 (-0.4506, 1.8318)            | -0.0164 (-1.0074, 0.9745)          |
| <b>(min)</b>            | Model 2 | 0.0255 (-0.1078, 0.1588)            | -0.0393 (-1.0448, 0.9662)           | 0.6439 (-0.5470, 1.8349)            | -0.2132 (-1.3452, 0.9188)          |
|                         | Model 3 | 0.0127 (-0.1208, 0.1463)            | -0.0806 (-1.0818, 0.9205)           | 0.6811 (-0.5190, 1.8812)            | -0.1737 (-1.3244, 0.9769)          |
|                         | Model 4 | 0.0077 (-0.1243, 0.1397)            | -0.1290 (-1.0943, 0.8362)           | 0.6015 (-0.5376, 1.7407)            | -0.2344 (-1.3202, 0.8515)          |
| <b>Median LPA bouts</b> | Model 1 | <b>2.8998* (0.6493, 5.1504)</b>     | <b>26.3984** (11.1481, 41.6488)</b> | -2.6662 (-19.0809, 13.7486)         | 5.1342 (-4.0340, 14.3025)          |
| <b>(min)</b>            | Model 2 | <b>2.7182* (0.4122, 5.0241)</b>     | <b>28.8048** (11.4550, 46.1545)</b> | -1.1139 (-18.6227, 16.3949)         | 7.2014 (-4.5408, 18.9435)          |
|                         | Model 3 | <b>2.7861* (0.4584, 5.1139)</b>     | <b>27.5975** (10.2718, 44.9231)</b> | -3.2535 (-20.5596, 14.0525)         | 6.5046 (-4.6497, 17.6590)          |
|                         | Model 4 | <b>2.7891* (0.4591, 5.1192)</b>     | <b>27.4903** (10.1654, 44.8152)</b> | -4.0566 (-21.9370, 13.8239)         | 6.2432 (-4.8003, 17.2866)          |

|                         |         |                                     |                                    |                           |                           |
|-------------------------|---------|-------------------------------------|------------------------------------|---------------------------|---------------------------|
| <b>Median MPA bouts</b> | Model 1 | 0.2402 (-0.1993, 0.6798)            | 1.1875 (-2.7352, 5.1102)           | 1.0126 (-3.3381, 5.3633)  | 0.1477 (-3.4475, 3.7429)  |
| <b>(min)</b>            | Model 2 | 0.2295 (-0.2212, 0.6801)            | 1.5477 (-2.5806, 5.6760)           | 1.0037 (-3.6151, 5.6226)  | 0.4417 (-3.1953, 4.0787)  |
|                         | Model 3 | 0.2957 (-0.1606, 0.7520)            | 1.8449 (-2.2367, 5.9266)           | 1.1574 (-3.5121, 5.8269)  | 0.3560 (-3.3776, 4.0896)  |
|                         | Model 4 | 0.2991 (-0.1492, 0.7474)            | 1.9338 (-2.0764, 5.9439)           | 1.4889 (-3.1879, 6.1656)  | 0.5020 (-3.2266, 4.2305)  |
| <b>Median VPA bouts</b> | Model 1 | <b>-0.3234** (-0.5000, -0.1469)</b> | <b>-2.1883* (-3.8404, -0.5361)</b> | -0.4419 (-1.6943, 0.8105) | -0.6768 (-1.8159, 0.4623) |
| <b>(min)</b>            | Model 2 | <b>-0.2086* (-0.4062, -0.0111)</b>  | -1.1168 (-2.9712, 0.7375)          | -0.4313 (-1.8428, 0.9802) | -0.1864 (-1.5004, 1.1275) |
|                         | Model 3 | -0.1876 (-0.3806, 0.0053)           | -0.9069 (-2.7503, 0.9365)          | -0.2746 (-1.6986, 1.1494) | -0.1703 (-1.4956, 1.1550) |
|                         | Model 4 | -0.1860 (-0.3800, 0.0081)           | -0.8374 (-2.6957, 1.0208)          | -0.1187 (-1.5477, 1.3102) | -0.1058 (-1.3917, 1.1802) |

$\beta$  (95% CI) Regression coefficients and 95% confidence intervals. Significant findings are reported in **bold**.

\* ( $p < 0.05$ ); \*\* ( $p < 0.01$ ).

Minimally-adjusted Model 1 adjusted for wear-time and trial involvement, and accounted for clustering within schools. Partially-adjusted Model 2 additionally adjusted for total daily volume of the corresponding intensity. Partially-adjusted Model 3 additionally adjusted for participants' age and sex, and fully-adjusted Model 4 further adjusted for socio-economic status.

Breaks in SED (number per day) were defined as an interruption in SED where counts exceeded 25 counts per 15-s epoch and averaged over all valid days.

Bouts were calculated as the average daily time accumulated in either  $\geq 1$ -min,  $\geq 5$ -min or  $\geq 10$ -min bouts of the corresponding intensities (in minutes), and averaged over included days. The presented numbers are the Mean  $\pm$  SD across the sample.

SED Sedentary; LPA Light-intensity physical activity; MPA Moderate-intensity physical activity; VPA Vigorous-intensity physical activity; zBMI Body mass index converted to the World Health Organization (WHO) Child Growth Standards age and sex standardized z-values [20].

**Table S6. Associations of activity patterns with lipids (n=525) and cardiometabolic risk score (n=404)**

|                           |         | <b>HDL-C</b>              | <b>LDL-C</b>              | <b>Triglycerides</b>      | <b>CMR-score</b>          |
|---------------------------|---------|---------------------------|---------------------------|---------------------------|---------------------------|
|                           |         | <b>β (95% CI)</b>         | <b>β (95% CI)</b>         | <b>β (95% CI)</b>         | <b>β (95% CI)</b>         |
| <b>Breaks in SED time</b> | Model 1 | -0.0007 (-0.0017, 0.0002) | 0.0008 (-0.0015, 0.0031)  | 0.0004 (-0.0007, 0.0015)  | 0.0066 (-0.0047, 0.0179)  |
| <b>(no. per day)</b>      | Model 2 | -0.0007 (-0.0017, 0.0002) | 0.0008 (-0.0015, 0.0031)  | 0.0004 (-0.0007, 0.0015)  | 0.0069 (-0.0041, 0.0178)  |
|                           | Model 3 | -0.0004 (-0.0013, 0.0006) | 0.0008 (-0.0017, 0.0032)  | -0.0001 (-0.0014, 0.0011) | 0.0058 (-0.0054, 0.0171)  |
|                           | Model 4 | -0.0004 (-0.0013, 0.0006) | 0.0008 (-0.0017, 0.0033)  | -0.0001 (-0.0014, 0.0012) | 0.0057 (-0.0055, 0.0169)  |
| <b>SED ≥5-min bouts</b>   | Model 1 | 0.0002 (-0.0008, 0.0012)  | -0.0001 (-0.0027, 0.0024) | 0.0004 (-0.0009, 0.0017)  | -0.0008 (-0.0142, 0.0127) |
| <b>(min/day)</b>          | Model 2 | 0.0002 (-0.0007, 0.0012)  | -0.0001 (-0.0026, 0.0024) | 0.0004 (-0.0009, 0.0016)  | -0.0012 (-0.0145, 0.0121) |
|                           | Model 3 | -0.0000 (-0.0010, 0.0010) | -0.0001 (-0.0026, 0.0025) | 0.0006 (-0.0007, 0.0019)  | -0.0002 (-0.0135, 0.0130) |
|                           | Model 4 | -0.0000 (-0.0010, 0.0010) | -0.0001 (-0.0027, 0.0025) | 0.0006 (-0.0007, 0.0020)  | -0.0002 (-0.0135, 0.0131) |
| <b>SED ≥10-min bouts</b>  | Model 1 | 0.0001 (-0.0010, 0.0012)  | 0.0002 (-0.0026, 0.0030)  | 0.0007 (-0.0006, 0.0020)  | 0.0014 (-0.0134, 0.0161)  |
| <b>(min/day)</b>          | Model 2 | 0.0002 (-0.0009, 0.0012)  | 0.0002 (-0.0026, 0.0029)  | 0.0006 (-0.0006, 0.0019)  | 0.0011 (-0.0134, 0.0157)  |

|                         |         |                                     |                                 |                                  |                                  |
|-------------------------|---------|-------------------------------------|---------------------------------|----------------------------------|----------------------------------|
|                         | Model 3 | -0.0000 (-0.0010, 0.0010)           | 0.0002 (-0.0026, 0.0030)        | 0.0007 (-0.0006, 0.0021)         | 0.0019 (-0.0126, 0.0163)         |
|                         | Model 4 | -0.0000 (-0.0010, 0.0010)           | 0.0002 (-0.0026, 0.0030)        | 0.0007 (-0.0006, 0.0020)         | 0.0014 (-0.0128, 0.0157)         |
| <b>LPA ≥1-min bouts</b> | Model 1 | -0.0009 (-0.0020, 0.0002)           | 0.0022 (-0.0005, 0.0049)        | 0.0002 (-0.0013, 0.0017)         | <b>0.0155* (0.0018, 0.0291)</b>  |
| <b>(min/day)</b>        | Model 2 | <b>-0.0042* (-0.0074, -0.0009)</b>  | 0.0072 (-0.0003, 0.0146)        | <b>0.0058** (0.0022, 0.0094)</b> | <b>0.0719** (0.0352, 0.1087)</b> |
|                         | Model 3 | <b>-0.0042* (-0.0074, -0.0010)</b>  | <b>0.0073* (0.0000, 0.0145)</b> | <b>0.0064** (0.0028, 0.0100)</b> | <b>0.0719** (0.0354, 0.1084)</b> |
|                         | Model 4 | <b>-0.0042* (-0.0074, -0.0010)</b>  | <b>0.0074* (0.0001, 0.0147)</b> | <b>0.0065** (0.0029, 0.0101)</b> | <b>0.0727** (0.0360, 0.1093)</b> |
| <b>LPA ≥5-min bouts</b> | Model 1 | <b>-0.0144** (-0.0217, -0.0070)</b> | 0.0073 (-0.0176, 0.0321)        | 0.0092 (-0.0067, 0.0250)         | <b>0.1755** (0.0525, 0.2984)</b> |
| <b>(min/day)</b>        | Model 2 | <b>-0.0155** (-0.0244, -0.0066)</b> | 0.0034 (-0.0238, 0.0306)        | 0.0133 (-0.0030, 0.0295)         | <b>0.1812* (0.0337, 0.3286)</b>  |
|                         | Model 3 | <b>-0.0170** (-0.0259, -0.0082)</b> | 0.0039 (-0.0232, 0.0310)        | <b>0.0173* (0.0014, 0.0331)</b>  | <b>0.1879* (0.0374, 0.3385)</b>  |
|                         | Model 4 | <b>-0.0168** (-0.0257, -0.0079)</b> | 0.0034 (-0.0235, 0.0302)        | <b>0.0170* (0.0009, 0.0331)</b>  | <b>0.1885* (0.0375, 0.3395)</b>  |
| <b>MPA ≥1-min bouts</b> | Model 1 | 0.0024 (-0.0026, 0.0075)            | -0.0043 (-0.0153, 0.0067)       | -0.0028 (-0.0083, 0.0028)        | -0.0116 (-0.0786, 0.0553)        |
| <b>(min/day)</b>        | Model 2 | <b>-0.0064* (-0.0125, -0.0003)</b>  | 0.0019 (-0.0155, 0.0194)        | 0.0101 (-0.0004, 0.0206)         | <b>0.1195* (0.0016, 0.2374)</b>  |
|                         | Model 3 | <b>-0.0061* (-0.0122, -0.0000)</b>  | 0.0021 (-0.0154, 0.0196)        | <b>0.0105* (0.0003, 0.0207)</b>  | <b>0.1199* (0.0014, 0.2383)</b>  |



|                         |         |                                    |                                    |                                 |                                     |
|-------------------------|---------|------------------------------------|------------------------------------|---------------------------------|-------------------------------------|
|                         | Model 4 | -0.0060 (-0.0121, 0.0000)          | 0.0020 (-0.0155, 0.0196)           | <b>0.0103* (0.0002, 0.0205)</b> | <b>0.1252* (0.0067, 0.2436)</b>     |
| <b>VPA ≥1-min bouts</b> | Model 1 | 0.0035 (-0.0015, 0.0086)           | <b>-0.0102* (-0.0191, -0.0013)</b> | -0.0030 (-0.0078, 0.0018)       | <b>-0.0703** (-0.1127, -0.0280)</b> |
| <b>(min/day)</b>        | Model 2 | <b>-0.0056* (-0.0107, -0.0006)</b> | -0.0054 (-0.0217, 0.0110)          | <b>0.0083* (0.0010, 0.0157)</b> | 0.0148 (-0.0375, 0.0671)            |
|                         | Model 3 | -0.0048 (-0.0099, 0.0003)          | -0.0050 (-0.0213, 0.0113)          | <b>0.0079* (0.0008, 0.0149)</b> | 0.0164 (-0.0395, 0.0724)            |
|                         | Model 4 | -0.0052 (-0.0106, 0.0001)          | -0.0043 (-0.0207, 0.0121)          | <b>0.0084* (0.0008, 0.0160)</b> | 0.0192 (-0.0385, 0.0769)            |
| <b>Median SED bouts</b> | Model 1 | -0.0065 (-0.0578, 0.0447)          | 0.0241 (-0.0898, 0.1379)           | 0.0294 (-0.0266, 0.0854)        | 0.3164 (-0.2881, 0.9209)            |
| <b>(min)</b>            | Model 2 | 0.0019 (-0.0466, 0.0503)           | 0.0226 (-0.0828, 0.1281)           | 0.0100 (-0.0430, 0.0629)        | 0.2177 (-0.3502, 0.7856)            |
|                         | Model 3 | -0.0010 (-0.0470, 0.0450)          | 0.0229 (-0.0840, 0.1298)           | 0.0091 (-0.0422, 0.0603)        | 0.2296 (-0.3337, 0.7929)            |
|                         | Model 4 | -0.0008 (-0.0478, 0.0463)          | 0.0216 (-0.0848, 0.1279)           | 0.0092 (-0.0419, 0.0603)        | 0.1913 (-0.3530, 0.7356)            |
| <b>Median LPA bouts</b> | Model 1 | <b>-0.6084* (-1.1361, -0.0806)</b> | 0.8721 (-0.4870, 2.2311)           | 0.6065 (-0.3393, 1.5523)        | 7.2704 (-0.5801, 15.1208)           |
| <b>(min)</b>            | Model 2 | <b>-0.6108* (-1.2210, -0.0005)</b> | 0.7248 (-0.6886, 2.1381)           | 0.7983 (-0.2307, 1.8272)        | 7.1844 (-2.2748, 16.6436)           |
|                         | Model 3 | <b>-0.6659* (-1.2777, -0.0541)</b> | 0.7464 (-0.6381, 2.1309)           | 0.9349 (-0.0525, 1.9224)        | 7.4014 (-2.0341, 16.8370)           |
|                         | Model 4 | <b>-0.6638* (-1.2751, -0.0525)</b> | 0.7358 (-0.6632, 2.1349)           | 0.9341 (-0.0538, 1.9219)        | 7.2404 (-2.2422, 16.7231)           |

|                         |         |                                 |                           |                           |                           |
|-------------------------|---------|---------------------------------|---------------------------|---------------------------|---------------------------|
| <b>Median MPA bouts</b> | Model 1 | -0.0379 (-0.2036, 0.1278)       | -0.0884 (-0.4550, 0.2782) | 0.2172 (-0.0685, 0.5028)  | 0.5524 (-2.0407, 3.1455)  |
| <b>(min)</b>            | Model 2 | -0.0830 (-0.2591, 0.0932)       | -0.0518 (-0.4465, 0.3429) | 0.2869 (-0.0151, 0.5889)  | 1.0930 (-1.6413, 3.8273)  |
|                         | Model 3 | -0.0679 (-0.2405, 0.1047)       | -0.0501 (-0.4454, 0.3453) | 0.2797 (-0.0125, 0.5719)  | 1.0768 (-1.6639, 3.8176)  |
|                         | Model 4 | -0.0732 (-0.2421, 0.0957)       | -0.0402 (-0.4417, 0.3613) | 0.2872 (-0.0016, 0.5759)  | 1.1241 (-1.5994, 3.8476)  |
| <b>Median VPA bouts</b> | Model 1 | <b>0.0649* (0.0088, 0.1211)</b> | -0.1446 (-0.3008, 0.0117) | -0.0423 (-0.1463, 0.0617) | -0.7885 (-1.5869, 0.0099) |
| <b>(min)</b>            | Model 2 | 0.0039 (-0.0659, 0.0737)        | -0.0914 (-0.2800, 0.0972) | 0.0362 (-0.0802, 0.1525)  | 0.0886 (-0.7225, 0.8997)  |
|                         | Model 3 | 0.0070 (-0.0631, 0.0771)        | -0.0918 (-0.2775, 0.0939) | 0.0247 (-0.0864, 0.1358)  | 0.0954 (-0.7193, 0.9100)  |
|                         | Model 4 | -0.0003 (-0.0692, 0.0686)       | -0.0796 (-0.2662, 0.1070) | 0.0347 (-0.0824, 0.1519)  | 0.1486 (-0.6750, 0.9722)  |

$\beta$  (95% CI) Regression coefficients and 95% confidence intervals. Significant findings are reported in **bold**.

\* ( $p < 0.05$ ); \*\* ( $p < 0.01$ ).

Minimally-adjusted Model 1 adjusted for wear-time and trial involvement, and accounted for clustering within schools. Partially-adjusted Model 2 additionally adjusted for total daily volume of the corresponding intensity. Partially-adjusted Model 3 additionally adjusted for participants' age and sex, and fully-adjusted Model 4 further adjusted for socio-economic status.

Breaks in SED (number per day) were defined as an interruption in SED where counts exceeded 25 counts per 15-s epoch and averaged over all valid days.

Bouts were calculated as the average daily time accumulated in either  $\geq 1$ -min,  $\geq 5$ -min or  $\geq 10$ -min bouts of the corresponding intensities (in minutes), and averaged over included days. The presented numbers are the Mean  $\pm$  SD across the sample.

SED Sedentary; LPA Light-intensity physical activity; MPA Moderate-intensity physical activity; VPA Vigorous-intensity physical activity; HDL-C High-density lipoprotein cholesterol; LDL-C Low-density lipoprotein cholesterol; CMR-score Cardiometabolic risk score.

**Figure S2a. zBMI (n=782)**

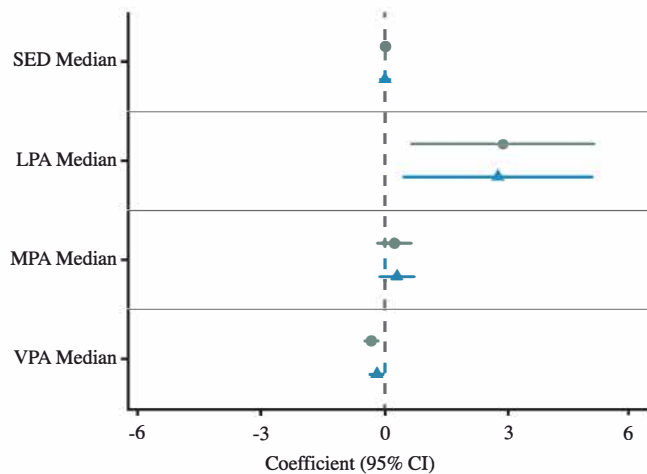

**Figure S2b. Waist circumference (n=782)**

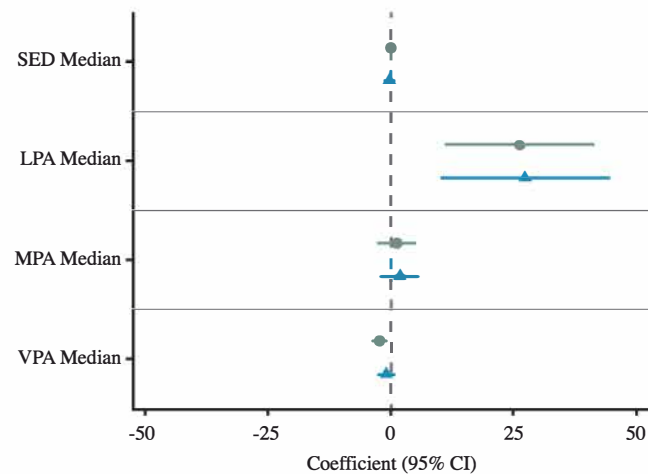

**Figure S2c. Systolic blood pressure (n=637)**

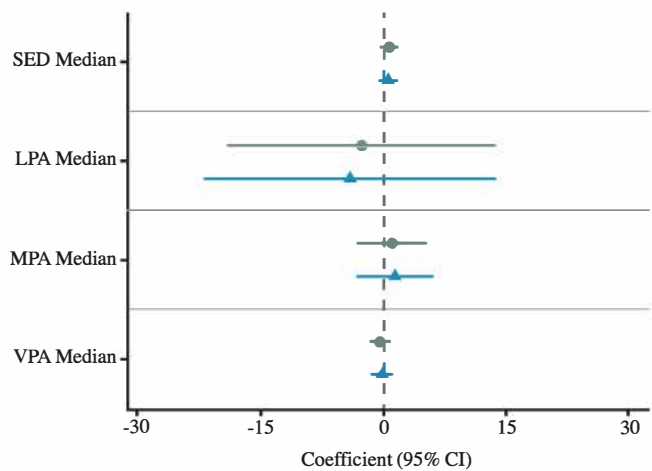

**Figure S2d. Diastolic blood pressure (n=637)**

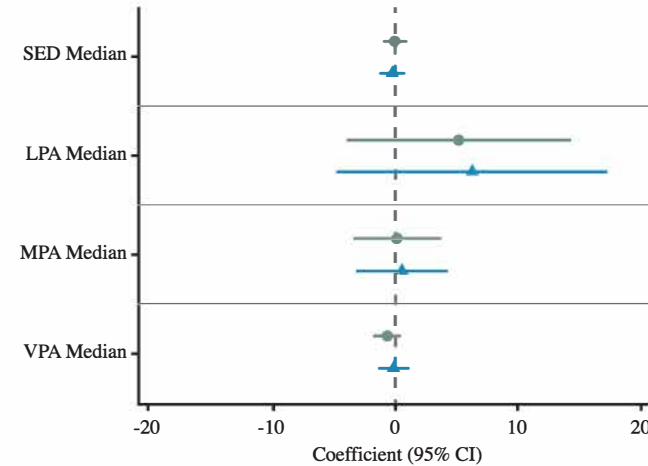

**Figure S2e. High-density lipoprotein cholesterol (n=525)**

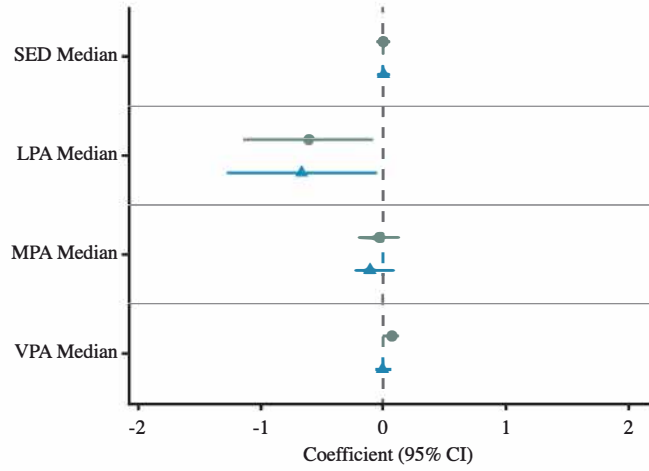

**Figure S2f. Low-density lipoprotein cholesterol (n=525)**

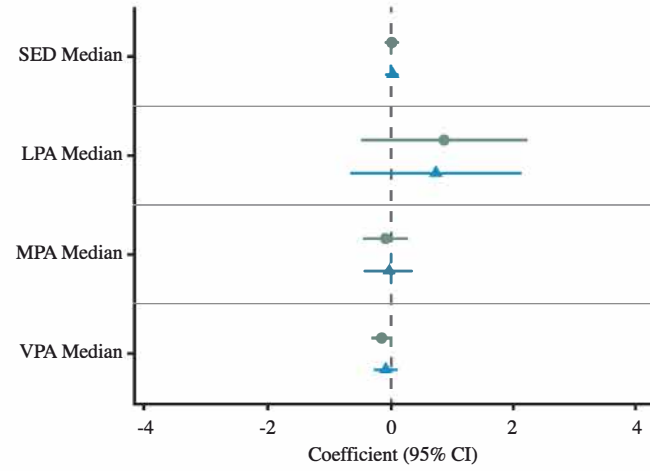

**Figure S2g. Triglycerides (n=525)**

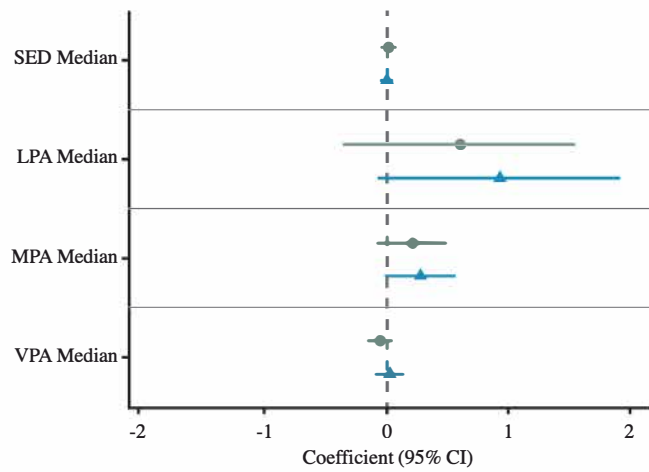

**Figure S2h. Cardiometabolic risk score (n=404)**

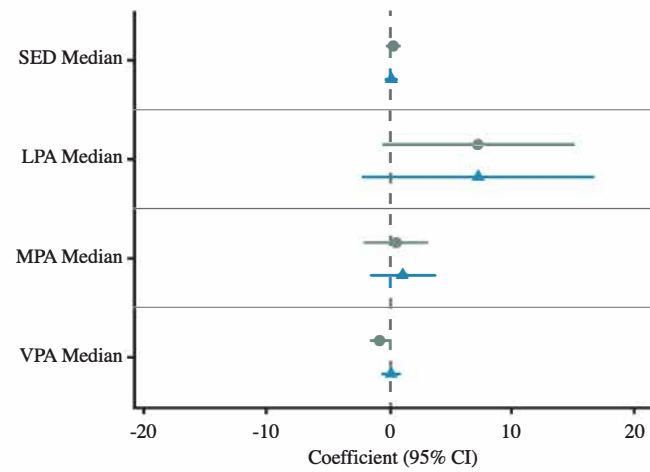

---

## Figure S2. Associations of median bout lengths with cardiometabolic risk factors

---

*Coefficient (95% CI)* Regression coefficients and 95% confidence intervals. Coefficients were standardised across figures to aid comparison between variables.

---

- Model 1 (adjusted for wear-time and trial involvement, and accounted for clustering within schools).
  - ▲ Model 4 (further adjusted for the total daily volume of the corresponding intensity, participants' age, sex, and socio-economic status).
- 

Results from the partially-adjusted Models 2-3 can be found in Tables S5-S6.

---

Median bout durations (in minutes) for all intensities were estimated by calculating all uninterrupted shortest bouts within the same intensity from smallest to largest and then identifying the mid-point [18].

---

*SED* Sedentary; *LPA* Light-intensity physical activity; *MPA* Moderate-intensity physical activity; *VPA* Vigorous-intensity physical activity; *zBMI* Body mass index converted to the World Health Organization (WHO) Child Growth Standards age and sex standardized z-values [20]; *min* Minutes.

---
